# Supplementary material for: Gut microbiota markers associated with obesity and overweight in Italian adults
Source: PubMed Central journal article supplement (PMC7943584; doi:10.1038/s41598-021-84928-w), 2021-03-09
Supplement: 41598_2021_84928_MOESM1_ESM.pdf [file 41598_2021_84928_MOESM1_ESM.pdf]

## **Gut microbiota markers associated with obesity and overweight in Italian adults**

Vanessa Palmas<sup>1†</sup>, Silvia Pisanu<sup>1†</sup>, Veronica Madau<sup>1</sup>, Emanuela Casula<sup>1</sup>, Andrea Deledda<sup>2</sup>, Roberto Cusano<sup>3</sup>, Paolo Uva<sup>3</sup>, Sarah Vascellari<sup>1</sup>, Andrea Loviselli<sup>2</sup>, Aldo Manzin<sup>1\*</sup>, Fernanda Velluzzi<sup>2\*</sup>

<sup>1</sup>Department of Biomedical Sciences, University of Cagliari, Cagliari, Italy

<sup>2</sup>Department of Medical Sciences and Public Health, University of Cagliari, Cagliari, Italy

<sup>3</sup>CRS4, Science and Technology Park Polaris, Piscina Manna, Pula, Cagliari, Italy

†These authors contributed equally to the work

\*These authors contributed equally to the work

Correspondence to: Prof. Aldo Manzin, Department of Biomedical Sciences, University of Cagliari, Microbiology and Virology Unit, Azienda Ospedaliero-Universitaria Cagliari, Strada Statale 554- bivio Sestu, I-09042 Monserrato, Cagliari (email: aldo.manzin@gmail.com).

## **Methods**

### **Diagnosis of metabolic syndrome**

Metabolic syndrome was diagnosed according to the International Diabetes Federation (IDF) criteria [1], which include the presence of central obesity (defined as waist circumference (WC)  $\geq 94$ cm for men and  $\geq 80$ cm for women) plus any two of the following four cardiometabolic risk factors: raised blood pressure (systolic  $\geq 130$  mmHg and / or diastolic  $\geq 85$  mmHg or treatment of previously diagnosed hypertension), triglycerides (TG)  $\geq 150$  mg/dl, low plasma levels of high-density lipoprotein (HDL) cholesterol ( $<40$  mg/dl in males and  $< 50$  mg/dl in females or specific treatment for these lipid abnormalities), impaired fasting glycemia (IFG): fasting plasma glucose (FPG)  $\geq 100$  mg/dl, or previously diagnosed type 2 diabetes (T2DM).

### **Anthropometric evaluation**

Anthropometric evaluation including height, weight, waist circumference measurement and impedance analysis was conducted at room temperature and under fasting conditions. The height expressed in cm was measured with a stadiometer, after removal of the shoes, with the participant's head being in the "Frankfort plane". The body weight, expressed in kilograms, was measured with an impedance scale (TANITA BC-420), also used for the analysis of the body composition. Waist circumference, expressed in centimeters, was measured using recommendations of the Airlie (VA) Consensus Conference. The impedance analysis was performed at room temperature, under fasting condition for at least 2 hours, and with the last moderate-intense physical activities at least 24 hours previously. BMI was calculated by the ratio of weight in kilograms and height in meters squared: normal range (normal-weight condition) was considered 18.5-24.99 kg/m<sup>2</sup>, the range for overweight was 25-29.99 kg/m<sup>2</sup>, for obese class I was 30-34.99 kg/m<sup>2</sup>, for obese class II was 35-39.99 kg/m<sup>2</sup> and for obese class III greater than or equal to 40 kg/m<sup>2</sup>.

### **Lifestyle factors assessment**

A weighted 3-day food intake record (3d-FR, including 2 days of the week and 1 weekend day) was analyzed with the Winfood ® software (v.3.0) and the following parameters were obtained: average daily caloric intake expressed in kcal, daily percentage of macronutrients intake (carbohydrates, lipids, and proteins), daily percentage of saturated lipids intake (on the total lipids intake), and daily intake of fiber in grams.

Overall, correct eating habits, based on the analysis of food diaries, were assessed on the extent of adherence to the Mediterranean diet (MD), attested by the calculation of the Mediterranean Diet Score (MedDietScore, range 0-55), a composite index of eleven food items, whose higher score indicate higher compliance [2].

The extent of alcohol consumption was established according to the MD model, defining "moderate" as a consumption of alcohol lower than 300 mL/ day, "rare" as the occasional consumption of alcohol (maximum 1 time per week) and "none" as the absence of alcohol consumption.

The level of physical activity was assessed by using the International Physical Activity Questionnaire short-form (IPAQ-SF), which consists of seven questions to capture the average daily time spent sitting, walking, and engaging in moderate and vigorous physical activity over the last seven days [3].

**Table S1. Clinical characteristics of metabolic syndrome discordant obese patient subgroups**

|                                                              | NW             | OWMS           | OMS            | <i>p</i> OWMS vs NW            | <i>p</i> OMS vs NW             | <i>p</i> OMS vs OWMS          |
|--------------------------------------------------------------|----------------|----------------|----------------|--------------------------------|--------------------------------|-------------------------------|
| N                                                            | 46             | 16             | 30             |                                |                                |                               |
| Age (M ± SD)                                                 | 49 ± 11        | 45.3 ± 13.2    | 52.3 ± 11.2    | 0.259                          | 0.229                          | 0.066                         |
| Female (n, %)                                                | 40, 87.0       | 15, 93.8       | 25, 83.3       | 0.460                          | 0.661                          | 0.318                         |
| <i>Anthropometric data</i>                                   |                |                |                |                                |                                |                               |
| BMI (M ± SD)                                                 | 21.6 ± 2.1     | 34.9 ± 5.0     | 36.7 ± 6.5     | <b>6.84 x 10<sup>-22</sup></b> | <b>1.91 x 10<sup>-23</sup></b> | 0.338                         |
| Fat mass (kg)                                                |                | 36.0 ± 9.4     | 40.8 ± 12.9    |                                |                                | 0.201                         |
| Fat mass (%)                                                 |                | 42.4 ± 5.0     | 42.3 ± 6.1     |                                |                                | 0.985                         |
| Muscle mass (Kg)                                             |                | 45.4 ± 4.1     | 50.1 ± 13.4    |                                |                                | 0.182                         |
| Waist circumference (cm) (M ± SD)                            | 73.7 ± 5.7     | 106.9 ± 16.4   | 113.2 ± 14.6   | <b>1.69 x 10<sup>-17</sup></b> | <b>1.40 x 10<sup>-26</sup></b> | 0.188                         |
| Overweight (N, %)                                            |                | 2, 12.5        | 3, 10.0        |                                |                                | 0.795                         |
| Obesity Class I (N; %)                                       |                | 7, 43.8        | 10, 33.3       |                                |                                | 0.486                         |
| Obesity Class II (N; %)                                      |                | 6, 37.5        | 11, 36.7       |                                |                                | 0.956                         |
| Obesity Class III (N, %)                                     |                | 1, 6.3         | 6, 20.0        |                                |                                | 0.216                         |
| <i>Lifestyle factors</i>                                     |                |                |                |                                |                                |                               |
| Smoking status Yes (n, %)                                    | 8, 17.8        | 6, 37.5        | 6, 20.0        | 0.107                          | 0.809                          | 0.198                         |
| Alcohol consumption None (n, %)                              | 10, 21.7       | 8, 50.0        | 13, 43.3       | <b>0.032</b>                   | <b>0.045</b>                   | 0.665                         |
| Alcohol consumption Rare (n, %)                              | 24, 52.2       | 7, 43.8        | 10, 33.3       | 0.562                          | 0.106                          | 0.486                         |
| Alcohol consumption Moderate (n, %)                          | 12, 26.1       | 1, 6.3         | 7, 23.3        | 0.093                          | 0.786                          | 0.145                         |
| Daily caloric intake kcal (M ± SD)                           | 1467.8 ± 162.3 | 1748.1 ± 556.3 | 1844.5 ± 669.0 | <b>0.003</b>                   | <b>4.67 x 10<sup>-4</sup></b>  | 0.338                         |
| Daily carbohydrates intake % (M ± SD)                        | 50.9 ± 3       | 49.8 ± 6.4     | 49.9 ± 6.7     | 0.323                          | 0.379                          | 0.930                         |
| Daily lipids intake % (M ± SD)                               | 27.2 ± 4.3     | 33.9 ± 6.7     | 32.8 ± 6.3     | <b>2.24 10<sup>-5</sup></b>    | <b>2.54 10<sup>-5</sup></b>    | 0.560                         |
| Daily saturated lipids intake/total lipids intake % (M ± SD) | 27.8 ± 4.3     | 36.0 ± 7.6     | 39.8 ± 6.0     | <b>2.46 10<sup>-6</sup></b>    | <b>1.74 10<sup>-14</sup></b>   | 0.091                         |
| Daily proteins intake grams (M ± SD)                         | 62.3 ± 8.8     | 69.1 ± 18.8    | 83.8 ± 52.4    | 0.058                          | <b>0.008</b>                   | 0.288                         |
| Daily fiber intake grams (M ± SD)                            | 20.0 ± 3.2     | 16.8 ± 11.6    | 13.5 ± 4.3     | 0.088                          | <b>2.81 x 10<sup>-10</sup></b> | 0.193                         |
| MedDietScore (M ± SD)                                        | 33.4 ± 4.1     | 27.3 ± 6.1     | 28.8 ± 5.1     | <b>2.47 x 10<sup>-5</sup></b>  | <b>4.13 x 10<sup>-5</sup></b>  | 0.366                         |
| IPAQ METs/week (M ± SD)                                      | 2604.8 ± 135.4 | 652.2 ± 586.7  | 667.0 ± 626.7  | <b>1.17 x 10<sup>-29</sup></b> | <b>5.35 x 10<sup>-32</sup></b> | 0.938                         |
| <i>Dyslipidemia</i>                                          |                |                |                |                                |                                |                               |
| Yes (n, %)                                                   | 0              | 3, 18.8        | 25, 83.3       |                                |                                | <b>1.91 x 10<sup>-5</sup></b> |
| <i>Alteration in glucose metabolism*</i>                     |                |                |                |                                |                                |                               |
| Yes (n, %)                                                   | 0              | 8, 50.0        | 24, 80.0       | NA                             |                                | <b>0.035</b>                  |
| <i>Hypertension</i>                                          |                |                |                |                                |                                |                               |
| Yes, %                                                       | 0              | 4, 75.0        | 23, 76.7       |                                |                                | <b>0.001</b>                  |

\*impaired Fasting Plasma Glucose (FPG) between 100–125 mg/dl (6.9 mmol/l), impaired glucose tolerance (IGT) if 2 h post-OGTT plasma glucose was 140–199 mg/dl (7.8–11.0 mmol/l), T2DM if FPG was ≥ 126 mg/dl (≥ 7 mmol/l) on two days apart, or if 2h post-OGTT plasma glucose was ≥ 200 mg/dl (≥ 11.1 mmol/l). The statistical significance was evaluated by *t* test for independent samples for continuous variables and by Pearson's chi-squared test for categorical variables. Bold values denote statistical significance (*p* < 0.05). NW= healthy normal-weight controls, OWMS= obese and overweight patients without metabolic syndrome, OMS= obese and overweight patients with metabolic syndrome.

**Table S2. Alpha diversity analysis between OB vs NW**

| Shannon index | Median (range)    | <i>p</i> |
|---------------|-------------------|----------|
| <b>OB</b>     | 2.40 (1.17, 3.10) | 0.840    |
| <b>NW</b>     | 2.39 (1.84, 2.68) |          |

Differences in the medians of Shannon index between OB and NW, evaluated by Kruskal-Wallis test. NW= normal-weight healthy controls, OB= overweight and obese patients. *p*-value equal to or less than 0.05 was considered statistically significant.

**Table S3. Alpha diversity analysis in OB across different BMI categories**

| Shannon index | Median (range)    | <i>p</i>          |                   |
|---------------|-------------------|-------------------|-------------------|
| NW            | 2.39 (1.84, 2.68) | 0.780             |                   |
| Overweight    | 2.17 (1.99, 2.54) |                   |                   |
| OB            | Class I           |                   | 2.42 (1.79, 2.92) |
|               | Class II          |                   | 2.42 (1.17, 3.10) |
|               | Class III         | 2.47 (1.54, 2.65) |                   |

Differences in the medians of Shannon index in OB across different BMI categories, evaluated by Kruskal-Wallis test. NW= normal-weight healthy controls, OB= obese patients. *p*-value equal to or less than 0.05 was considered statistically significant.

**Table S4. Alpha diversity analysis between NW, OWMS and OMS**

| Shannon index | Median (range)    | <i>p</i> |
|---------------|-------------------|----------|
| <b>NW</b>     | 2.36 (1.84, 2.68) | 0.873    |
| <b>OWMS</b>   | 2.42 (1.94, 2.93) |          |
| <b>OMS</b>    | 2.39 (1.17, 3.10) |          |

Differences in the medians of Shannon index between metabolic syndrome discordant obese patient subgroups, evaluated by Kruskal-Wallis test. NW= normal-weight healthy controls, OWMS= overweight and obese patients without metabolic syndrome, OMS= overweight and obese patients with metabolic syndrome. *p*-value equal to or less than 0.05 was considered statistically significant.

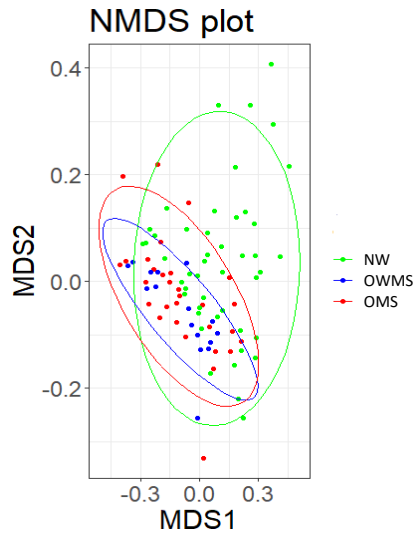

**Fig. S1. GM beta diversity analysis between NW, OWMS and OMS**

The three-dimensional scatter plots, generated using the Non-Metric Multidimensional Scaling (NMDS) based on Bray-Curtis distance in R software v.3.5.2 (ggplot2 package), showed a marked separation between the GM communities of groups. The statistical significance among the two groups was determined with Permutational Multivariate Analysis of Variance (PERMANOVA) (R-vegan, function adonis), adjusted for sex, age and smoking status (sum of squares= 0.642, mean of squares= 0.321, F= 2.955,  $p= 0.007$ ).  $p$ - value equal to or less than 0.05 was considered statistically significant. Pairwise PERMANOVA test confirmed significant segregation only in the comparison between OMS and NW ( $p= 0.030$ ).

**Table S5. Median and range of the relative abundance of each taxonomic level in OB and NW**

| Taxonomic profile   | OB     |                  | NW     |                  |
|---------------------|--------|------------------|--------|------------------|
|                     | Median | Range (min, max) | Median | Range (min, max) |
| Actinobacteria      | 2.12   | (0.51, 22.23)    | 1.86   | (0.14, 14.45)    |
| Bacteroidetes       | 29.69  | (2.94, 74.72)    | 40.59  | (7.18, 83.43)    |
| Chloroflexi         | 0.05   | (0.02, 0.59)     | 0.08   | (0.01, 0.67)     |
| Cyanobacteria       | 0.16   | (0.08, 1.97)     | 0.40   | (0.05, 3.95)     |
| Firmicutes          | 54.00  | (15.39, 87.86)   | 47.10  | (13.85, 67.75)   |
| Proteobacteria      | 3.61   | (1.36, 23.48)    | 3.18   | (1.31, 30.61)    |
| Synergistetes       | 0.06   | (0.01, 0.25)     | 0.03   | (0.00, 2.33)     |
| Verrucomicrobia     | 0.13   | (0.01, 36.7)     | 0.24   | (0.00, 25.08)    |
| Alcaligenaceae      | 0.13   | (0.01, 6.49)     | 0.39   | (0.00, 2.62)     |
| Anaerobrancaeeae    | 0.03   | (0.00, 0.96)     | 0.06   | (0.00, 2.17)     |
| Bacteroidaceae      | 16.13  | (1.05, 57.72)    | 25.53  | (4.52, 66.51)    |
| Bifidobacteriaceae  | 1.30   | (0.09, 20.90)    | 1.05   | (0.01, 13.86)    |
| Caldilineaceae      | 0.05   | (0.00, 0.58)     | 0.08   | (0.01, 0.65)     |
| Clostridiaceae      | 4.85   | (1.47, 11.65)    | 4.55   | (0.74, 20.62)    |
| Comamonadaceae      | 0.03   | (0.00, 0.93)     | 0.04   | (0.00, 0.71)     |
| Coprobacillaceae    | 0.05   | (0.00, 1.61)     | 0.02   | (0.00, 4.70)     |
| Coriobacteriaceae   | 0.47   | (0.06, 8.94)     | 0.22   | (0.02, 3.52)     |
| Desulfohalobiaceae  | 0.05   | (0.00, 0.63)     | 0.07   | (0.00, 1.27)     |
| Desulfovibrionaceae | 0.16   | (0.01, 9.93)     | 0.27   | (0.00, 2.61)     |
| Enterobacteriaceae  | 0.71   | (0.04, 21.37)    | 0.89   | (0.03, 12.87)    |

**Table S5. Median and range of the relative abundance of each taxonomic level in OB and NW**

| Taxonomic profile             | OB     |                  | NW     |                  |
|-------------------------------|--------|------------------|--------|------------------|
|                               | Median | Range (min, max) | Median | Range (min, max) |
| Erysipelotrichaceae           | 0.21   | (0.02, 3.85)     | 0.25   | (0.01, 7.40)     |
| Eubacteriaceae                | 0.09   | (0.02, 0.36)     | 0.07   | (0.02, 0.33)     |
| Flavobacteriaceae             | 1.61   | (0.04, 7.65)     | 3.89   | (0.18, 21.96)    |
| Gemellaceae                   | 0.08   | (0.02, 0.48)     | 0.05   | (0.01, 0.17)     |
| Lachnospiraceae               | 15.14  | (3.35, 79.95)    | 10.39  | (0.00, 26.07)    |
| Lactobacillaceae              | 0.11   | (0.01, 4.06)     | 0.08   | (0.00, 1.09)     |
| Microbacteriaceae             | 0.10   | (0.04, 4.52)     | 0.10   | (0.00, 6.01)     |
| Nostocaceae                   | 0.08   | (0.03, 1.79)     | 0.13   | (0.02, 3.61)     |
| Odoribacteraceae              | 0.12   | (0.00, 0.68)     | 0.28   | (0.00, 3.18)     |
| Paenibacillaceae              | 0.05   | (0.01, 0.43)     | 0.03   | (0.01, 0.36)     |
| Paraprevotellaceae            | 0.08   | (0.00, 14.47)    | 0.05   | (0.00, 3.03)     |
| Pasteurellaceae               | 0.02   | (0.00, 2.19)     | 0.02   | (0.00, 1.86)     |
| Peptococcaceae                | 0.17   | (0.04, 0.95)     | 0.18   | (0.02, 1.57)     |
| Porphyromonadaceae            | 1.16   | (0.08, 6.86)     | 2.61   | (0.09, 14.87)    |
| Prevotellaceae                | 0.16   | (0.01, 24.45)    | 0.04   | (0.00, 39.80)    |
| Rikenellaceae                 | 0.02   | (0.00, 4.27)     | 0.00   | (0.00, 0.50)     |
| Ruminococcaceae               | 15.24  | (1.33, 52.40)    | 16.75  | (4.23, 48.19)    |
| Sphingobacteriaceae           | 0.38   | (0.02, 3.45)     | 1.12   | (0.15, 9.52)     |
| Streptococcaceae              | 0.25   | (0.06, 10.21)    | 0.10   | (0.02, 1.48)     |
| Streptomycetaceae             | 0.09   | (0.04, 1.31)     | 0.07   | (0.02, 0.86)     |
| Succinivibrionaceae           | 0.00   | (0.00, 0.26)     | 0.00   | (0.00, 23.55)    |
| Thermicanaceae                | 0.03   | (0.00, 3.45)     | 0.01   | (0.00, 0.32)     |
| Thiotrichaceae                | 0.03   | (0.00, 0.31)     | 0.06   | (0.01, 0.78)     |
| Veillonellaceae               | 4.23   | (0.27, 38.39)    | 2.61   | (0.08, 15.71)    |
| Verrucomicrobiaceae           | 0.12   | (0.00, 36.50)    | 0.24   | (0.00, 25.00)    |
| <i>Acetobacterium</i>         | 0.09   | (0.02, 0.36)     | 0.07   | (0.02, 0.30)     |
| <i>Acidaminococcus</i>        | 0.02   | (0.00, 4.77)     | 0.00   | (0.00, 9.34)     |
| <i>Akkermansia</i>            | 0.06   | (0.00, 31.54)    | 0.20   | (0.00, 22.30)    |
| <i>Alkaliphilus</i>           | 0.32   | (0.04, 3.86)     | 0.43   | (0.04, 6.37)     |
| <i>Anaerobranca</i>           | 0.03   | (0.00, 0.96)     | 0.06   | (0.00, 2.17)     |
| <i>Anaerofilum</i>            | 0.08   | (0.00, 0.74)     | 0.12   | (0.01, 1.35)     |
| <i>Anaerostipes</i>           | 0.09   | (0.00, 1.41)     | 0.08   | (0.00, 2.65)     |
| <i>Bacteroides</i>            | 16.13  | (1.05, 57.72)    | 25.53  | (4.52, 66.51)    |
| <i>Bifidobacterium</i>        | 1.29   | (0.08, 20.75)    | 1.04   | (0.01, 13.84)    |
| <i>Bilophila</i>              | 0.06   | (0.00, 1.93)     | 0.12   | (0.00, 1.06)     |
| <i>Blautia</i>                | 6.76   | (1.29, 18.49)    | 4.80   | (0.00, 15.90)    |
| <i>Butyricimonas</i>          | 0.04   | (0.00, 0.59)     | 0.06   | (0.00, 2.52)     |
| <i>Caldilinea</i>             | 0.05   | (0.00, 0.58)     | 0.08   | (0.01, 0.650)    |
| <i>Caloramator</i>            | 0.03   | (0.01, 1.95)     | 0.07   | (0.01, 14.09)    |
| <i>Candidatus Blochmannia</i> | 0.02   | (0.01, 0.10)     | 0.03   | (0.00, 2.87)     |
| <i>Catenibacterium</i>        | 0.00   | (0.00, 1.61)     | 0.00   | (0.00, 4.67)     |
| <i>Clostridium</i>            | 2.46   | (0.74, 7.69)     | 2.17   | (0.46, 10.65)    |
| <i>Collinsella</i>            | 0.17   | (0.00, 7.08)     | 0.08   | (0.00, 2.14)     |
| <i>Coprococcus</i>            | 0.30   | (0.02, 4.44)     | 0.30   | (0.04, 2.83)     |
| <i>Desulfonauticus</i>        | 0.05   | (0.00, 0.62)     | 0.07   | (0.00, 1.27)     |
| <i>Desulfotomaculum</i>       | 0.05   | (0.00, 0.47)     | 0.07   | (0.00, 1.50)     |
| <i>Desulfovibrio</i>          | 0.08   | (0.01, 9.54)     | 0.04   | (0.00, 2.49)     |
| <i>Dialister</i>              | 0.00   | (0.00, 17.15)    | 0.01   | (0.00, 15.22)    |
| <i>Dorea</i>                  | 0.27   | (0.00, 5.27)     | 0.16   | (0.00, 5.30)     |
| <i>Dysgonomonas</i>           | 0.06   | (0.00, 3.58)     | 0.04   | (0.00, 12.40)    |
| <i>Enterobacter</i>           | 0.07   | (0.00, 2.67)     | 0.01   | (0.00, 0.49)     |
| <i>Erysipelothrix</i>         | 0.12   | (0.02, 1.72)     | 0.16   | (0.01, 7.34)     |
| <i>Escherichia</i>            | 0.20   | (0.00, 11.14)    | 0.04   | (0.00, 1.80)     |

**Table S5. Median and range of the relative abundance of each taxonomic level in OB and NW**

| Taxonomic profile                     | OB     |                  | NW     |                  |
|---------------------------------------|--------|------------------|--------|------------------|
|                                       | Median | Range (min, max) | Median | Range (min, max) |
| <i>Eubacterium</i>                    | 0.02   | (0.00, 2.12)     | 0.01   | (0.00, 0.37)     |
| <i>Faecalibacterium</i>               | 8.68   | (0.42, 45.17)    | 6.10   | (0.68, 37.40)    |
| <i>Flavobacterium</i>                 | 1.49   | (0.02, 7.55)     | 3.42   | (0.00, 21.82)    |
| <i>Gemella</i>                        | 0.08   | (0.02, 0.48)     | 0.05   | (0.00, 0.17)     |
| <i>Kitasatospora</i>                  | 0.08   | (0.02, 1.22)     | 0.05   | (0.01, 0.82)     |
| <i>Klebsiella</i>                     | 0.04   | (0.00, 0.34)     | 0.00   | (0.00, 10.64)    |
| <i>Lachnobacterium</i>                | 0.01   | (0.00, 2.97)     | 0.01   | (0.00, 3.19)     |
| <i>Lachnospira</i>                    | 0.41   | (0.04, 3.55)     | 0.47   | (0.01, 4.68)     |
| <i>Lactobacillus</i>                  | 0.10   | (0.01, 3.88)     | 0.08   | (0.02, 1.02)     |
| <i>Luteibacter</i>                    | 0.00   | (0.00, 0.04)     | 0.00   | (0.00, 0.02)     |
| <i>Megamonas</i>                      | 0.00   | (0.00, 13.29)    | 0.00   | (0.00, 0.11)     |
| <i>Megasphaera</i>                    | 0.03   | (0.00, 25.59)    | 0.01   | (0.00, 0.24)     |
| <i>Mitsuokella</i>                    | 0.00   | (0.00, 3.89)     | 0.00   | (0.00, 0.20)     |
| <i>Natronincola</i>                   | 0.43   | (0.11, 1.94)     | 0.28   | (0.07, 1.35)     |
| <i>Negativicoccus</i>                 | 0.06   | (0.00, 4.84)     | 0.01   | (0.00, 0.27)     |
| <i>Oscillospira</i>                   | 1.58   | (0.15, 18.28)    | 3.16   | (0.00, 20.02)    |
| <i>Parabacteroides</i>                | 0.88   | (0.00, 6.29)     | 1.92   | (0.08, 14.76)    |
| <i>Paraprevotella</i>                 | 0.06   | (0.00, 14.47)    | 0.04   | (0.00, 1.63)     |
| <i>Pedobacter</i>                     | 0.13   | (0.00, 2.82)     | 0.44   | (0.03, 3.89)     |
| <i>Peptoniphilus</i>                  | 0.07   | (0.03, 0.75)     | 0.07   | (0.00, 0.59)     |
| <i>Phascolarctobacterium</i>          | 0.33   | (0.03, 27.00)    | 0.97   | (0.00, 7.47)     |
| <i>Prevotella</i>                     | 0.16   | (0.01, 24.45)    | 0.04   | (0.00, 39.80)    |
| <i>Pseudobutyrvibrio</i>              | 0.31   | (0.01, 5.04)     | 0.23   | (0.00, 1.90)     |
| <i>Rikenella</i>                      | 0.02   | (0.00, 4.27)     | 0.09   | (0.00, 1.38)     |
| <i>Roseburia</i>                      | 1.75   | (0.00, 52.25)    | 1.00   | (0.00, 14.23)    |
| <i>Ruminococcus</i>                   | 3.50   | (0.41, 13.09)    | 3.53   | (0.00, 25.46)    |
| <i>Sedimentibacter</i>                | 0.07   | (0.01, 0.32)     | 0.07   | (0.01, 0.94)     |
| <i>Serratia</i>                       | 0.09   | (0.00, 5.70)     | 0.02   | (0.00, 0.24)     |
| <i>Slackia</i>                        | 0.12   | (0.03, 1.73)     | 0.06   | (0.01, 1.18)     |
| <i>Sphingobacterium</i>               | 0.09   | (0.00, 0.54)     | 0.18   | (0.00, 2.25)     |
| <i>Streptococcus</i>                  | 0.23   | (0.05, 9.99)     | 0.10   | (0.02, 1.45)     |
| <i>Sutterella</i>                     | 0.12   | (0.01, 6.48)     | 0.39   | (0.00, 2.61)     |
| <i>Thermicanus</i>                    | 0.03   | (0.00, 3.45)     | 0.01   | (0.00, 0.32)     |
| <i>Thiothrix</i>                      | 0.03   | (0.00, 0.31)     | 0.06   | (0.01, 0.78)     |
| <i>Veillonella</i>                    | 0.10   | (0.01, 4.02)     | 0.03   | (0.01, 1.79)     |
| <i>Acidaminococcus fermentans</i>     | 0.00   | (0.00, 2.95)     | 0.00   | (0.00, 0.16)     |
| <i>Acidaminococcus intestini</i>      | 0.01   | (0.00, 1.90)     | 0.00   | (0.00, 2.34)     |
| <i>Akkermansia muciniphila</i>        | 0.06   | (0.00, 31.54)    | 0.20   | (0.00, 22.29)    |
| <i>Alkaliphilus crotonatoxidans</i>   | 0.08   | (0.00, 3.71)     | 0.22   | (0.01, 6.31)     |
| <i>Alkaliphilus peptidifermentans</i> | 0.04   | (0.00, 1.16)     | 0.02   | (0.00, 4.40)     |
| <i>Anaerobranca zavarzinii</i>        | 0.03   | (0.00, 0.96)     | 0.06   | (0.00, 2.17)     |
| <i>Anaerofilum pentosovorans</i>      | 0.04   | (0.00, 0.61)     | 0.06   | (0.01, 1.23)     |
| <i>Bacteroides caccae</i>             | 0.12   | (0.00, 2.64)     | 0.43   | (0.00, 4.51)     |
| <i>Bacteroides cellulosilyticus</i>   | 0.03   | (0.00, 0.79)     | 0.10   | (0.00, 4.24)     |
| <i>Bacteroides coprocola</i>          | 0.03   | (0.00, 12.88)    | 0.01   | (0.00, 11.67)    |
| <i>Bacteroides coprophilus</i>        | 0.00   | (0.00, 2.62)     | 0.00   | (0.00, 3.51)     |
| <i>Bacteroides denticanum</i>         | 0.10   | (0.00, 3.91)     | 0.07   | (0.01, 4.51)     |
| <i>Bacteroides dorei</i>              | 0.31   | (0.00, 18.13)    | 0.99   | (0.00, 13.89)    |
| <i>Bacteroides eggerthii</i>          | 0.00   | (0.00, 13.40)    | 0.00   | (0.00, 2.92)     |
| <i>Bacteroides fragilis</i>           | 0.00   | (0.00, 0.48)     | 0.00   | (0.00, 4.28)     |
| <i>Bacteroides intestinalis</i>       | 0.00   | (0.00, 1.69)     | 0.00   | (0.00, 3.61)     |
| <i>Bacteroides massiliensis</i>       | 0.00   | (0.00, 2.08)     | 0.00   | (0.00, 1.57)     |
| <i>Bacteroides ovatus</i>             | 0.13   | (0.00, 7.41)     | 0.27   | (0.00, 14.55)    |

**Table S5. Median and range of the relative abundance of each taxonomic level in OB and NW**

| Taxonomic profile                       | OB     |                  | NW     |                  |
|-----------------------------------------|--------|------------------|--------|------------------|
|                                         | Median | Range (min, max) | Median | Range (min, max) |
| <i>Bacteroides paurosaccharolyticus</i> | 0.11   | (0.00, 0.79)     | 0.13   | (0.00, 0.70)     |
| <i>Bacteroides plebeius</i>             | 0.00   | (0.00, 8.26)     | 0.00   | (0.00, 13.97)    |
| <i>Bacteroides rodentium</i>            | 0.91   | (0.043, 6.07)    | 2.29   | (0.39, 13.66)    |
| <i>Bacteroides salanitronis</i>         | 0.00   | (0.00, 7.60)     | 0.00   | (0.00, 1.48)     |
| <i>Bacteroides salyersiae</i>           | 0.00   | (0.00, 0.95)     | 0.00   | (0.00, 9.30)     |
| <i>Bacteroides sartorii</i>             | 0.16   | (0.01, 4.03)     | 0.21   | (0.02, 0.71)     |
| <i>Bacteroides stercorisoris</i>        | 0.27   | (0.04, 2.02)     | 0.39   | (0.11, 2.44)     |
| <i>Bacteroides stercoris</i>            | 0.13   | (0.00, 11.69)    | 0.08   | (0.00, 20.16)    |
| <i>Bacteroides thetaiotaomicron</i>     | 0.15   | (0.00, 3.16)     | 0.30   | (0.00, 6.49)     |
| <i>Bacteroides uniformis</i>            | 0.80   | (0.00, 6.21)     | 2.21   | (0.31, 16.21)    |
| <i>Bacteroides vulgatus</i>             | 0.68   | (0.02, 20.48)    | 1.08   | (0.04, 27.46)    |
| <i>Bacteroides xylanisolvens</i>        | 0.64   | (0.05, 6.14)     | 0.88   | (0.14, 16.24)    |
| <i>Bifidobacterium adolescentis</i>     | 0.05   | (0.00, 7.55)     | 0.03   | (0.00, 3.05)     |
| <i>Bifidobacterium catenulatum</i>      | 0.01   | (0.00, 7.30)     | 0.00   | (0.00, 1.59)     |
| <i>Bifidobacterium choerinum</i>        | 0.02   | (0.00, 0.77)     | 0.02   | (0.00, 0.85)     |
| <i>Bifidobacterium kashiwanohense</i>   | 0.02   | (0.00, 2.57)     | 0.00   | (0.00, 0.250)    |
| <i>Bifidobacterium longum</i>           | 0.12   | (0.00, 7.76)     | 0.18   | (0.00, 8.62)     |
| <i>Bifidobacterium scardovii</i>        | 0.05   | (0.00, 2.38)     | 0.06   | (0.00, 1.64)     |
| <i>Bifidobacterium stercoris</i>        | 0.20   | (0.07, 5.58)     | 0.11   | (0.00, 2.40)     |
| <i>Bilophila wadsworthia</i>            | 0.05   | (0.00, 1.92)     | 0.12   | (0.00, 1.06)     |
| <i>Blautia coccoides</i>                | 1.39   | (0.25, 5.70)     | 1.01   | (0.22, 5.07)     |
| <i>Blautia hansenii</i>                 | 0.29   | (0.02, 1.36)     | 0.24   | (0.02, 0.94)     |
| <i>Blautia obeum</i>                    | 0.01   | (0.00, 0.51)     | 0.04   | (0.00, 0.96)     |
| <i>Blautia wexlerae</i>                 | 0.32   | (0.02, 5.90)     | 0.30   | (0.04, 2.33)     |
| <i>Caldilinea tarbellica</i>            | 0.05   | (0.00, 0.58)     | 0.08   | (0.01, 0.65)     |
| <i>Caloramator mitchellensis</i>        | 0.02   | (0.00, 1.93)     | 0.05   | (0.00, 13.63)    |
| <i>Candidatus Blochmannia rufipes</i>   | 0.00   | (0.00, 0.00)     | 0.00   | (0.00, 2.86)     |
| <i>Citrobacter freundii</i>             | 0.00   | (0.00, 4.98)     | 0.00   | (0.00, 0.04)     |
| <i>Clostridium alkalicellulosi</i>      | 0.31   | (0.00, 2.55)     | 0.29   | (0.03, 3.44)     |
| <i>Clostridium frigidis</i>             | 0.07   | (0.00, 2.23)     | 0.03   | (0.00, 1.49)     |
| <i>Clostridium thermosuccinogenes</i>   | 0.04   | (0.00, 0.43)     | 0.05   | (0.01, 0.48)     |
| <i>Collinsella aerofaciens</i>          | 0.13   | (0.00, 6.28)     | 0.05   | (0.00, 1.82)     |
| <i>Coprococcus eutactus</i>             | 0.00   | (0.00, 2.46)     | 0.00   | (0.00, 1.12)     |
| <i>Desulfonauticus autotrophicus</i>    | 0.05   | (0.00, 0.62)     | 0.07   | (0.00, 1.27)     |
| <i>Desulfotomaculum indicum</i>         | 0.05   | (0.00, 0.47)     | 0.07   | (0.00, 1.50)     |
| <i>Desulfovibrio fairfieldensis</i>     | 0.01   | (0.00, 8.00)     | 0.01   | (0.00, 2.00)     |
| <i>Desulfovibrio piger</i>              | 0.02   | (0.00, 1.04)     | 0.00   | (0.00, 0.56)     |
| <i>Dialister invisus</i>                | 0.00   | (0.00, 17.14)    | 0.00   | (0.00, 15.22)    |
| <i>Dorea formicigenerans</i>            | 0.05   | (0.00, 2.53)     | 0.04   | (0.00, 0.70)     |
| <i>Dysgonomonas wimpennyi</i>           | 0.06   | (0.00, 3.58)     | 0.03   | (0.00, 12.19)    |
| <i>Erysipelothrix inopinata</i>         | 0.01   | (0.00, 0.44)     | 0.04   | (0.00, 3.35)     |
| <i>Erysipelothrix muris</i>             | 0.08   | (0.01, 1.72)     | 0.09   | (0.01, 2.55)     |
| <i>Escherichia albertii</i>             | 0.17   | (0.00, 8.59)     | 0.03   | (0.00, 1.78)     |
| <i>Eubacterium bifforme</i>             | 0.00   | (0.00, 1.95)     | 0.00   | (0.00, 0.36)     |
| <i>Faecalibacterium prausnitzii</i>     | 1.41   | (0.00, 6.71)     | 0.85   | (0.00, 9.77)     |
| <i>Klebsiella variicola</i>             | 0.01   | (0.00, 0.04)     | 0.00   | (0.00, 4.46)     |
| <i>Lachnospira pectinoschiza</i>        | 0.26   | (0.04, 2.25)     | 0.37   | (0.01, 1.99)     |
| <i>Megamonas funiformis</i>             | 0.00   | (0.00, 4.86)     | 0.00   | (0.00, 0.07)     |
| <i>Megasphaera hominis</i>              | 0.02   | (0.00, 8.38)     | 0.01   | (0.00, 0.07)     |
| <i>Negativicoccus succinicivorans</i>   | 0.06   | (0.00, 4.84)     | 0.01   | (0.00, 0.27)     |
| <i>Oscillospira eae</i>                 | 0.43   | (0.03, 4.22)     | 0.74   | (0.08, 7.12)     |
| <i>Oscillospira guilliermondii</i>      | 0.05   | (0.00, 0.44)     | 0.09   | (0.03, 0.55)     |
| <i>Parabacteroides distasonis</i>       | 0.24   | (0.00, 3.39)     | 0.59   | (0.00, 10.73)    |



| Taxonomic profile                          | OB     |                  | NW     |                  |
|--------------------------------------------|--------|------------------|--------|------------------|
|                                            | Median | Range (min, max) | Median | Range (min, max) |
| <i>Parabacteroides goldsteinii</i>         | 0.03   | (0.00, 0.33)     | 0.05   | (0.00, 3.81)     |
| <i>Parabacteroides johnsonii</i>           | 0.04   | (0.00, 4.23)     | 0.03   | (0.00, 2.81)     |
| <i>Parabacteroides merdae</i>              | 0.28   | (0.00, 2.74)     | 0.49   | (0.00, 4.70)     |
| <i>Paraprevotella clara</i>                | 0.03   | (0.00, 3.46)     | 0.03   | (0.00, 1.42)     |
| <i>Pedobacter kwangyangensis</i>           | 0.01   | (0.00, 1.08)     | 0.03   | (0.00, 2.14)     |
| <i>Phascolarctobacterium faecium</i>       | 0.03   | (0.01, 9.51)     | 0.01   | (0.00, 3.98)     |
| <i>Phascolarctobacterium succinatutens</i> | 0.01   | (0.01, 5.72)     | 0.12   | (0.00, 2.75)     |
| <i>Prevotella copri</i>                    | 0.00   | (0.00, 24.28)    | 0.00   | (0.00, 26.17)    |
| <i>Prevotella shahii</i>                   | 0.01   | (0.00, 1.86)     | 0.00   | (0.00, 1.28)     |
| <i>Pseudobutyrvibrio xylanivorans</i>      | 0.31   | (0.01, 5.04)     | 0.23   | (0.00, 1.90)     |
| <i>Rikenella microfusum</i>                | 0.02   | (0.00, 4.27)     | 0.09   | (0.00, 1.38)     |
| <i>Roseburia faecis</i>                    | 0.55   | (0.00, 6.19)     | 0.45   | (0.00, 2.82)     |
| <i>Ruminococcus albus</i>                  | 0.00   | (0.00, 1.61)     | 0.06   | (0.00, 1.97)     |
| <i>Ruminococcus bromii</i>                 | 0.11   | (0.00, 1.99)     | 0.30   | (0.00, 6.69)     |
| <i>Ruminococcus callidus</i>               | 0.02   | (0.00, 0.97)     | 0.05   | (0.00, 2.26)     |
| <i>Ruminococcus gnavus</i>                 | 0.32   | (0.00, 9.82)     | 0.10   | (0.01, 1.04)     |
| <i>Ruminococcus torques</i>                | 0.03   | (0.00, 2.23)     | 0.03   | (0.00, 1.71)     |
| <i>Sphingobacterium bambusae</i>           | 0.02   | (0.00, 0.28)     | 0.02   | (0.00, 2.22)     |
| <i>Sphingobacterium shayense</i>           | 0.04   | (0.00, 0.44)     | 0.09   | (0.00, 1.23)     |
| <i>Streptococcus vestibularis</i>          | 0.05   | (0.00, 4.17)     | 0.02   | (0.00, 0.61)     |
| <i>Sutterella wadsworthensis</i>           | 0.01   | (0.00, 5.90)     | 0.00   | (0.00, 1.23)     |
| <i>Veillonella atypica</i>                 | 0.01   | (0.00, 1.06)     | 0.01   | (0.00, 0.57)     |

Medians were expressed as percentage (0-100), NW= normal-weight healthy controls, OB= obese and overweight patients.

**Table S6. Firmicutes/Bacteroidetes ratio analysis between OB and NW**

|           | Median (range)     | <i>p</i> |
|-----------|--------------------|----------|
| <b>OB</b> | 1.77 (0.25, 21.90) | 0.007    |
| <b>NW</b> | 1.27 (0.17, 9.24)  |          |

Differences in the Firmicutes/Bacteroidetes ratio between OB and NW, evaluated by Kruskal-Wallis test. NW= normal-weight healthy controls, OB= overweight and obese patients. *p*-value equal to or less than 0.05 was considered statistically significant.

**Table S7. Firmicutes/Bacteroidetes ratio analysis in OB across different BMI categories**

|            |           | Median (range)     | <i>p</i> |
|------------|-----------|--------------------|----------|
| NW         |           | 1.12 (0.17, 9.24)  | 0.111    |
| Overweight |           | 2.49 (1.01, 5.36)  |          |
| OB         | Class I   | 1.70 (0.56, 18.96) |          |
|            | Class II  | 1.95 (0.25, 18.38) |          |
|            | Class III | 2.55 (0.29, 21.90) |          |

Differences in the Firmicutes/Bacteroidetes ratio in OB across different BMI categories, evaluated by Kruskal-Wallis test. NW= normal-weight healthy controls, OB= overweight and obese patients. No statistically significant results were obtained in all the different categories. *p*-value equal to or less than 0.05 was considered statistically significant.

**Table S8. Firmicutes/Bacteroidetes ratio analysis between NW, OWMS and OMS**

|      | Median (range)     | overall <i>p</i> | Bonferroni <i>p</i> (OMS vs NW) |
|------|--------------------|------------------|---------------------------------|
| NW   | 1.12 (0.17, 9.24)  | 0.038            | 0.025                           |
| OWMS | 1.58 (0.56, 18.96) |                  |                                 |
| OMS  | 1.89 (0.25, 21.90) |                  |                                 |

Differences in the Firmicutes/Bacteroidetes ratio, between NW, OMS and OWMS, evaluated by Kruskal-Wallis test followed by Bonferroni correction for multiple comparisons. NW= normal-weight healthy controls, OWMS= overweight and obese patients without metabolic syndrome, OMS= overweight and obese patients with metabolic syndrome. *p*-value equal to or less than 0.05 was considered statistically significant.

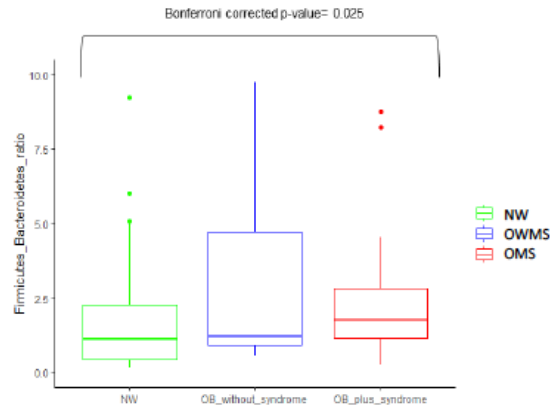

**Fig. S2. Statistically significant differences in Firmicutes/Bacteroidetes ratio between NW, OWMS and OMS**  
The statistical significance **was** observed only in the comparison between OMS and NW ( $p= 0.025$ ) performed by Kruskal-Wallis test followed by Bonferroni correction for multiple comparisons **in R software v.3.5.2**. Plots were **generated in R software v.3.5.2 (ggplot2 package)**.  $p$ -value equal to or less than 0.05 was considered statistically significant. NW= normal-weight healthy controls, OWMS= overweight and obese patients without metabolic syndrome, OMS= overweight and obese patients with metabolic syndrome.

**Table S9. Median and range of the relative abundance of each statistically significant bacterial taxa in the comparison between OB and NW**

| Phylum        | Family              | Genus                   | Species                  | OB<br>Median (range) | NW<br>Median (range) |
|---------------|---------------------|-------------------------|--------------------------|----------------------|----------------------|
| Bacteroidetes |                     |                         |                          | 29.69 (2.94, 74.72)  | 40.59 (7.18, 83.43)  |
| Bacteroidetes | Bacteroidaceae      | <i>Bacteroides</i>      | <i>B. rodentium</i>      | 0.91 (0.04, 6.07)    | 2.29 (0.39, 13.66)   |
| Bacteroidetes | Bacteroidaceae      | <i>Bacteroides</i>      | <i>B. uniformis</i>      | 0.80 (0.00, 3.16)    | 2.21 (0.31, 16.21)   |
| Bacteroidetes | Flavobacteriaceae   |                         |                          | 1.61 (0.04, 7.65)    | 3.89 (0.18, 21.96)   |
| Bacteroidetes | Flavobacteriaceae   | <i>Flavobacterium</i>   |                          | 1.49 (0.02, 7.55)    | 3.42 (0.00, 21.82)   |
| Bacteroidetes | Porphyromonadaceae  |                         |                          | 1.16 (0.08, 6.86)    | 2.61 (0.09, 14.87)   |
| Bacteroidetes | Rikenellaceae       | <i>Rikenella</i>        |                          | 0.02 (0.00, 4.27)    | 0.09 (0.00, 1.38)    |
| Bacteroidetes | Rikenellaceae       | <i>Rikenella</i>        | <i>R. microfusus</i>     | 0.02 (0.00, 4.27)    | 0.09 (0.00, 1.38)    |
| Bacteroidetes | Sphingobacteriaceae |                         |                          | 0.38 (0.02, 3.45)    | 1.12 (0.15, 9.52)    |
| Bacteroidetes | Sphingobacteriaceae | <i>Pedobacter</i>       |                          | 0.13 (0.00, 2.82)    | 0.44 (0.03, 3.89)    |
| Bacteroidetes | Sphingobacteriaceae | <i>Pedobacter</i>       | <i>P. kwangyangensis</i> | 0.01 (0.00, 1.08)    | 0.03 (0.00, 2.14)    |
| Bacteroidetes | Sphingobacteriaceae | <i>Sphingobacterium</i> |                          | 0.08 (0.00, 0.54)    | 0.18 (0.00, 2.25)    |
| Bacteroidetes | Tannerellaceae      | <i>Parabacteroides</i>  |                          | 0.88 (0.00, 6.29)    | 1.92 (0.08, 14.76)   |
| Bacteroidetes | Tannerellaceae      | <i>Parabacteroides</i>  | <i>P. distasonis</i>     | 0.24 (0.00, 3.39)    | 0.59 (0.00, 10.73)   |
| Firmicutes    |                     |                         |                          | 54.00 (15.39, 87.86) | 47.10 (13.85, 67.75) |
| Firmicutes    | Acidaminococcaceae  | <i>Acidaminococcus</i>  | <i>A. intestini</i>      | 0.01 (0.00, 1.90)    | 0.00 (0.00, 2.34)    |
| Firmicutes    | Eubacteriaceae      | <i>Eubacterium</i>      | <i>E. biforme</i>        | 0.00 (0.00, 1.95)    | 0.00 (0.00, 0.36)    |
| Firmicutes    | Gemellaceae         |                         |                          | 0.08 (0.02, 0.48)    | 0.05 (0.01, 0.17)    |
| Firmicutes    | Gemellaceae         | <i>Gemella</i>          |                          | 0.08 (0.02, 0.48)    | 0.05 (0.00, 0.17)    |
| Firmicutes    | Lachnospiraceae     |                         |                          | 15.14 (3.35, 79.95)  | 10.39 (0.00, 26.07)  |
| Firmicutes    | Odoribacteraceae    |                         |                          | 0.12 (0.00, 0.68)    | 0.28 (0.00, 3.18)    |
| Firmicutes    | Paenibacillaceae    |                         |                          | 0.05 (0.01, 0.43)    | 0.03 (0.01, 0.36)    |

**Table S9. Median and range of the relative abundance of each statistically significant bacterial taxa in the comparison between OB and NW**

| Phylum         | Family                | Genus                | Species              | OB<br>Median (range) | NW<br>Median (range) |
|----------------|-----------------------|----------------------|----------------------|----------------------|----------------------|
| Firmicutes     | Ruminococcaceae       | <i>Oscillospira</i>  | <i>O. eae</i>        | 0.43 (0.03, 4.22)    | 0.74 (0.08, 7.12)    |
| Firmicutes     | Ruminococcaceae       | <i>Ruminococcus</i>  | <i>R. gnavus</i>     | 0.31 (0.02, 9.82)    | 0.10 (0.01, 1.04)    |
| Firmicutes     | Selenomonadaceae      | <i>Megamonas</i>     |                      | 0.00 (0.00, 13.29)   | 0.00 (0.00, 0.11)    |
| Firmicutes     | Selenomonadaceae      | <i>Megamonas</i>     | <i>M. funiformis</i> | 0.00 (0.00, 4.86)    | 0.00 (0.00, 0.07)    |
| Firmicutes     | Selenomonadaceae      | <i>Mitsuokella</i>   |                      | 0.00 (0.00, 3.89)    | 0.00 (0.00, 0.20)    |
| Firmicutes     | Streptococcaceae      |                      |                      | 0.24 (0.06, 10.21)   | 0.10 (0.02, 1.48)    |
| Firmicutes     | Streptococcaceae      | <i>Streptococcus</i> |                      | 0.23 (0.05, 9.99)    | 0.10 (0.02, 1.45)    |
| Firmicutes     | Thermicanaceae        |                      |                      | 0.03 (0.00, 3.45)    | 0.01 (0.00, 0.32)    |
| Firmicutes     | Thermicanaceae        | <i>Thermicanus</i>   |                      | 0.03 (0.00, 3.45)    | 0.01 (0.00, 0.32)    |
| Firmicutes     | Veillonellaceae       | <i>Megasphaera</i>   |                      | 0.03 (0.00, 25.59)   | 0.01 (0.00, 0.24)    |
| Firmicutes     | Veillonellaceae       | <i>Megasphaera</i>   | <i>M. hominis</i>    | 0.02 (0.00, 8.38)    | 0.01 (0.00, 0.07)    |
| Firmicutes     | Veillonellaceae       | <i>Veillonella</i>   |                      | 0.10 (0.01, 4.02)    | 0.03 (0.01, 1.79)    |
| Firmicutes     | Veillonellaceae       | <i>Veillonella</i>   | <i>V. atypica</i>    | 0.01 (0.00, 1.06)    | 0.01 (0.00, 0.57)    |
| Proteobacteria | <b>Alcaligenaceae</b> |                      |                      | 0.13 (0.01, 6.49)    | 0.39 (0.00, 2.62)    |
| Proteobacteria | Desulfovibrionaceae   | <i>Desulfovibrio</i> | <i>D. piger</i>      | 0.02 (0.00, 1.04)    | 0.00 (0.00, 0.56)    |
| Proteobacteria | Enterobacteriaceae    | <i>Candidatus</i>    | <i>C.B. rufipes</i>  | 0.00 (0.00, 0.00)    | 0.00 (0.00, 2.86)    |
|                |                       | <i>Blochmannia</i>   |                      |                      |                      |
| Proteobacteria | Enterobacteriaceae    | <i>Enterobacter</i>  |                      | 0.07 (0.00, 2.67)    | 0.01 (0.00, 0.49)    |
| Proteobacteria | Enterobacteriaceae    | <i>Escherichia</i>   |                      | 0.20 (0.00, 11.14)   | 0.04 (0.00, 1.80)    |
| Proteobacteria | Enterobacteriaceae    | <i>Escherichia</i>   | <i>E. albertii</i>   | 0.17 (0.00, 8.59)    | 0.03 (0.00, 1.78)    |
| Proteobacteria | Enterobacteriaceae    | <i>Klebsiella</i>    |                      | 0.04 (0.00, 0.34)    | 0.00 (0.00, 10.64)   |
| Proteobacteria | Sutterellaceae        | <i>Sutterella</i>    |                      | 0.12 (0.01, 6.48)    | 0.39 (0.00, 2.61)    |

**Table S9. Median and range of the relative abundance of each statistically significant bacterial taxa in the comparison between OB and NW**

| Phylum         | Family       | Genus           | Species | OB Median (range) | NW Median (range) |
|----------------|--------------|-----------------|---------|-------------------|-------------------|
| Proteobacteria | Yersiniaceae | <i>Serratia</i> |         | 0.09 (0.00, 5.70) | 0.02 (0.00, 0.24) |

A multivariate association with linear models (MaAsLin) was used to perform a multivariate analysis on GM composition between OB and NW (adjusted for sex, age and smoking status) on R software v.3.5.2. Table shows only the statistically significant bacterial taxa in the comparison between OB and NW. NW= normal-weight healthy controls, OB= overweight and obese patients. Medians were expressed as percentage (0-100).

**Table S10. Statistically significant differences in the relative abundance of bacterial taxa in OB across different BMI categories**

| Phylum         | Family              | Genus                                   | Species              | <i>q</i> | Coefficient | OB class III median (range) | NW median (range)  |
|----------------|---------------------|-----------------------------------------|----------------------|----------|-------------|-----------------------------|--------------------|
| Bacteroidetes  | Bacteroidaceae      | <i>Bacteroides</i>                      | <i>B. uniformis</i>  | 0.18     | 0.11        | 0.31 (0.02, 1.08)           | 2.21 (0.31, 16.21) |
| Firmicutes     | Erysipelotrichaceae | <i>Catenibacterium</i>                  |                      | 0.21     | -0.01       | 0.06 (0.00, 0.63)           | 0.00 (0.00, 4.67)  |
| Firmicutes     | Selenomonadaceae    | <i>Mitsuokella</i>                      |                      | 0.09     | 0.00        | 0.22 (0.00, 3.89)           | 0.00 (0.00, 0.20)  |
| Proteobacteria | Enterobacteriaceae  | <i>Candidatus</i><br><i>Blochmannia</i> | <i>C. B. rufipes</i> | 0.12     | 0.07        | 0.00 (0.00, 0.00)           | 0.00 (0.00, 2.86)  |

A multivariate association with linear models (MaAsLin) was used to perform a multivariate analysis on GM composition in OB across different BMI categories (adjusted for sex, age and smoking status) on R software (v.3.5.2). Statistically significant differences in the relative abundance of bacterial taxa were observed only in the comparison between OB class III group and NW. NW= normal-weight healthy controls, OB= overweight and obese patients, *q*-values: *p*-values adjusted for Benjamini and Hochberg False Discovery Rate (FDR) correction test for multiple comparisons (FDR<0.250), Coefficient= median difference between OB Class III and NW (median relative abundance in OB Class III minus median relative abundance in NW).

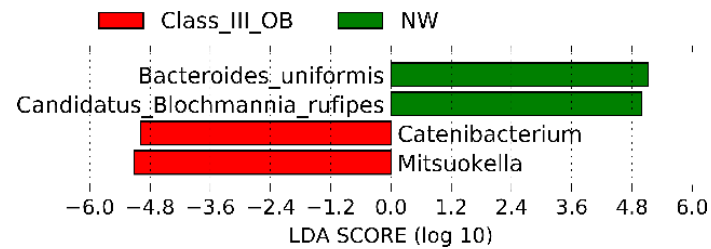

**Fig. S3. Linear Discriminant Analysis Effect Size (LEfSe) of microbial taxa in OB across different BMI categories**  
 LEfSe plot of taxonomic biomarkers was generated on Galaxy computational tool v.1.0. (<https://huttenhower.sph.harvard.edu/galaxy/>). Results were ranked by their Linear Discriminant Analysis (LDA) score. Red bacterial taxa were more abundant in OB Class III; green bacterial taxa were more abundant in NW. NW= normal-weight healthy controls, OB= overweight and obese patients

**Table S11. Statistically significant differences in the relative abundance of bacterial taxa between OWMS and NW**

| Phylum         | Family             | Genus              | Species              | <i>q</i> | Coefficient | OWMS<br>Median (range) | NW<br>Median (range) |
|----------------|--------------------|--------------------|----------------------|----------|-------------|------------------------|----------------------|
| Firmicutes     | Selenomonadaceae   | <i>Megamonas</i>   |                      | 0.001    | -0.003      | 0.00 (0.01, 25.59)     | 0.01 (0.00, 0.24)    |
| Firmicutes     | Selenomonadaceae   | <i>Megamonas</i>   | <i>M. funiformis</i> | 0.001    | -0.003      | 0.00 (0.00, 0.01)      | 0.00 (0.00, 10.64)   |
| Firmicutes     | Veillonellaceae    | <i>Megasphaera</i> |                      | 0.008    | -0.005      | 0.03 (0.01, 25.59)     | 0.01 (0.00, 0.24)    |
| Firmicutes     | Veillonellaceae    | <i>Megasphaera</i> | <i>M. hominis</i>    | 0.039    | -0.005      | 0.03 (0.01, 8.38)      | 0.01 (0.00, 0.07)    |
| Proteobacteria | Enterobacteriaceae | <i>Klebsiella</i>  |                      | -0.010   | 0.036       | 0.05 (0.00, 0.34)      | 0.00 (0.00, 10.64)   |

A multivariate association with linear models (MaAsLin) was used to perform a multivariate analysis on GM composition between OWMS and NW groups (adjusted for sex, age and smoking status) on R software (v.3.5.2). NW= normal-weight healthy controls, OWMS= overweight and obese patients without metabolic syndrome, *q*-values: *p*-values adjusted for Benjamini and Hochberg false discovery rate (FDR) correction test for multiple comparisons (FDR<0.05), Coefficient= median difference between OWMS and NW (median relative abundance in OWMS minus median relative abundance in NW).

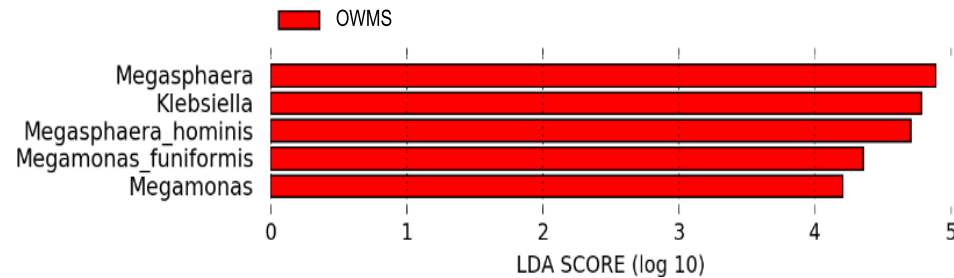

**Fig. S4. Linear Discriminant Analysis Effect Size (LEfSe) of microbial taxa between OWMS and normal-weight controls**  
 LEfSe plot of taxonomic biomarkers was generated on Galaxy computational tool v.1.0. (<https://huttenhower.sph.harvard.edu/galaxy/>).  
 Results were ranked by their Linear Discriminant Analysis (LDA) score. Red bacterial taxa were more abundant in OWMS group compared to NW. NW= normal-weight healthy controls, OWMS= overweight and obese patients without metabolic syndrome.

**Table S12. Statistically significant differences in the relative abundance of bacterial taxa between OMS and NW**

| Phylum         | Family             | Genus              | Species                       | <i>q</i> | Coefficient | OMS median (range) | NW Median (range)  |
|----------------|--------------------|--------------------|-------------------------------|----------|-------------|--------------------|--------------------|
| Firmicutes     | Eubacteriaceae     | <i>Eubacterium</i> | <i>E. bifforme</i>            | 0.010    | 0.035       | 0.00 (0.00, 1.95)  | 0.00 (0.00, 0.36)  |
|                |                    |                    | <i>Megamonas</i>              | 0.004    | 0.003       | 0.00 (0.00, 13.29) | 0.00 (0.00, 0.11)  |
|                | Veillonellaceae    | <i>Megaspheara</i> | <i>M. funiformis</i>          | 0.004    | 0.003       | 0.00 (0.00, 4.86)  | 0.00 (0.00, 0.07)  |
|                |                    |                    | <i>M. hominis</i>             | 0.010    | 0.005       | 0.02 (0.00, 0.33)  | 0.01 (0.00, 0.07)  |
|                |                    |                    | <i>Candidatus Blochmannia</i> | 0.004    | -0.056      | 0.00 (0.00, 0.00)  | 0.00 (0.00, 2.86)  |
| Proteobacteria | Enterobacteriaceae | <i>Klebsiella</i>  | <i>C. B. rufipes</i>          | 0.042    | -0.014      | 0.03 (0.00, 0.25)  | 0.00 (0.00, 10.64) |

A multivariate association with linear models (MaAsLin) was used to perform a multivariate analysis on GM composition between OMS and NW groups (adjusted for sex, age and smoking status) on R software (v.3.5.2). NW= normal-weight healthy controls, OMS= overweight and obese patients with metabolic syndrome, *q*-values: *p*-values adjusted for Benjamini and Hochberg false discovery rate (FDR) correction test for multiple comparisons (FDR<0.05), Coefficient= median difference between OMS and NW (median relative abundance in OMS minus median relative abundance in NW).





**Table S13. Spearman's correlation between significant taxa and clinical parameters in OB**

| Phylum         | Family              | Genus                  | species            | Variable              | R                 | p                        |       |        |
|----------------|---------------------|------------------------|--------------------|-----------------------|-------------------|--------------------------|-------|--------|
| Bacteroidetes  | Flavobacteriaceae   |                        |                    | BMI                   | -0.399            | 0.006                    |       |        |
|                |                     |                        |                    | FM (%)                | -0.365            | 0.013                    |       |        |
|                |                     |                        |                    | MedDietScore          | 0.307             | 0.038                    |       |        |
|                |                     |                        |                    | WC (cm)               | -0.322            | 0.029                    |       |        |
|                |                     |                        |                    | <i>Flavobacterium</i> |                   |                          |       |        |
|                |                     |                        |                    | FM (%)                | -0.367            | 0.012                    |       |        |
|                |                     |                        |                    | MedDietScore          | 0.298             | 0.045                    |       |        |
|                |                     |                        |                    | WC (cm)               | -0.325            | 0.028                    |       |        |
|                |                     | Odoribacteraceae       |                    |                       | Age               | 0.345                    | 0.019 |        |
|                |                     | Odoribacteraceae       |                    |                       | BMI               | 0.019                    | 0.017 |        |
|                |                     | Porphyromonadaceae     |                    |                       | FM (%)            | -0.292                   | 0.049 |        |
|                |                     | Rikenellaceae          | <i>Rikenella</i>   |                       | Age               | 0.371                    | 0.011 |        |
|                |                     | Rikenellaceae          | <i>Rikenella</i>   | <i>R. microfusus</i>  | Age               | 0.371                    | 0.011 |        |
|                |                     | Sphingobacteriaceae    |                    |                       | MedDietScore      | 0.332                    | 0.024 |        |
|                |                     |                        |                    |                       | <i>Pedobacter</i> |                          |       |        |
|                |                     |                        |                    |                       | <i>Pedobacter</i> | <i>P. kwangyangensis</i> | BMI   | -0.470 |
|                |                     |                        |                    |                       | FM (Kg)           | -0.406                   | 0.005 |        |
|                |                     |                        |                    | MedDietScore          | 0.312             | 0.035                    |       |        |
|                |                     |                        |                    | WC (cm)               | -0.414            | 0.004                    |       |        |
|                | Tannerellaceae      | <i>Parabacteroides</i> |                    | Proteins (g)          | 0.311             | 0.045                    |       |        |
| Firmicutes     | Selenomonadaceae    |                        |                    | IPAQ (METs/weeks)     | -0.342            | 0.020                    |       |        |
|                |                     |                        |                    |                       | <i>Megamonas</i>  |                          |       |        |
|                |                     |                        |                    |                       | <i>Megamonas</i>  |                          |       |        |
|                |                     |                        |                    | <i>M. funiformis</i>  | IPAQ (METs/weeks) | -0.304                   | 0.045 |        |
|                |                     | Thermicanaceae         |                    |                       | MM (Kg)           | -0.325                   | 0.027 |        |
|                |                     |                        | <i>Thermicanus</i> |                       | MM (Kg)           | -0.325                   | 0.027 |        |
|                | Veillonellaceae     | <i>Megasphaera</i>     |                    | IPAQ (METs/weeks)     | -0.342            | 0.020                    |       |        |
|                |                     |                        | <i>M. hominis</i>  | IPAQ (METs/weeks)     | -0.365            | 0.013                    |       |        |
| Proteobacteria | Desulfovibrionaceae | <i>Desulfovibrio</i>   | <i>D. piger</i>    | MM (Kg)               | -0.374            | 0.010                    |       |        |

Spearman's correlations were calculated in R software (v.3.5.2). Only significant bacterial taxa identified in the multivariate analysis were correlated to clinical parameters. FM (%)= Fat Mass expressed in percentage, FM (kg)= kilograms of fat mass, IPAQ (METs/weeks) = number of METs for week, MM (kg)= Muscle Mass expressed in kg, WC= Waist circumference, BMI= Body Mass Index, MedDietScore= Mediterranean Diet Score, OB= obese and overweight patients. R= r coefficient. p-value equal to or less than 0.05 was considered statistically significant.

**Table S14. Spearman’s correlation between significant taxa and clinical parameters in NW**

| Phylum       | Family             | Genus                   | species            | Variable             | R      | p      |
|--------------|--------------------|-------------------------|--------------------|----------------------|--------|--------|
| Bacteoidetes | Flavobacteriaceae  | <i>Flavobacterium</i>   |                    | Proteins (g)         | 0.305  | 0.039  |
|              |                    |                         |                    | IPAQ (METs/weeks)    | 0.304  | 0.040  |
| Firmicutes   | Eubacteriaceae     | <i>Sphingobacterium</i> | <i>E. bifforme</i> | Age                  | -0.362 | 0.013  |
|              |                    | <i>Eubacterium</i>      |                    | Proteins (g)         | 0.299  | 0.043  |
|              | Veillonellaceae    | <i>Megasphaera</i>      | <i>M. hominis</i>  | IPAQ (METs/weeks)    | -0.397 | 0.006  |
|              |                    |                         |                    | BMI                  | -0.364 | 0.013  |
|              | Veillonellaceae    | <i>Megasphaera</i>      | <i>M. hominis</i>  | BMI                  | -0.319 | 0.031  |
|              | Enterobacteriaceae | <i>Candidatus</i>       | <i>Blochmannia</i> | <i>C. B. rufipes</i> | Age    | -0.438 |

Spearman’s correlations were calculated in R software (v.3.5.2). Only significant bacterial taxa identified in the multivariate analysis were correlated to clinical parameters, IPAQ (METs/weeks) = number of METs for week, BMI= Body Mass Index, NW= normal-weight healthy controls, R= r coefficient. *p*-value equal to or less than 0.05 was considered statistically significant.

## References

1. Alberti KG, Zimmet P, Shaw J; IDF Epidemiology Task Force Consensus Group. The metabolic syndrome--a new worldwide definition. *Lancet*. Sep 24-30;366(9491):1059-62 (2005).
2. Panagiotakos, D. B., Pitsavos, C., Arvaniti, F., & Stefanadis, C. Adherence to the Mediterranean food pattern predicts the prevalence of hypertension, hypercholesterolemia, diabetes and obesity, among healthy adults; the accuracy of the MedDietScore. *Prev Med*. 44(4), 335–340 (2007).
3. Lavelle, G. *et al.* Validity of the International Physical Activity Questionnaire Short Form (IPAQ-SF) as a measure of physical activity (PA) in young people with cerebral palsy: A cross-sectional study. *Physiotherapy*. 107, 209–215 (2020).
